# Supplementary material for: scMelody: An Enhanced Consensus-Based Clustering Model for Single-Cell Methylation Data by Reconstructing Cell-to-Cell Similarity
Source: Front Bioeng Biotechnol. 2022 Feb 23;10:842019. doi: 10.3389/fbioe.2022.842019 (PMC8905497; doi:10.3389/fbioe.2022.842019)
Supplement: Supplementary file 2 [file DataSheet2.xlsx]

## Sheet: Table S1
Table S1. 10 cell types from the ENCODE bulk RRBS data
Cell lineage	Organism	Sex	Age
Peripheral blood mononuclear cell	Human	M	54
Breast		F	21
Testis		M	41
Liver		F	83
Adrenal gland		F	88
Skeletal muscle		F	83
Placenta		F	29
Brain		M	66
Uterus		F	44
Pancreas		M	71

## Sheet: Table S2
Table S2. Runtime of the benchmarked methods on the real datasets (hours)
Data	SW+HC	PearsonHC	PDclust	EpiclomalR	scMelody
Smallwood	0.095	0.036	0.038	0.174	0.123
Farlik2015	0.142	0.066	0.067	0.315	0.207
Hou	0.038	0.027	0.027	0.103	0.086
Pott	0.029	0.021	0.02	0.071	0.062
Farlik2016	0.312	0.14	0.143	0.478	0.425
Luo-human	3.56	2.05	2.09	8.45	6.24
Luo-mouse	4.04	2.55	2.56	9.86	7.68

## Sheet: Table S3
Table S3. The novel cell clusters on the Farlik2016 dataset
cell ID	Tissue	Sex	Sequencing	Annotation	Cluster
GSM2324625	cord blood	M	scWGBS	HSC	MPP
GSM2324628	cord blood	M	scWGBS	HSC	MPP
GSM2324631	cord blood	M	scWGBS	HSC	MPP
GSM2324638	cord blood	M	scWGBS	HSC	MPP
GSM2324639	cord blood	M	scWGBS	HSC	MPP
GSM2324641	cord blood	M	scWGBS	HSC	MPP

## Sheet: Table S4
Table S4. The statistic information of methylation levels on CTCF
Number of families	1
Number of comparisons per family	3
Alpha	0.05
Tukey's multiple comparisons test	Mean Diff.	95.00% CI of diff.	Below threshold?	Summary	Adjusted P Value
HSC-raw vs. HSC-sub	3.532	0.4220 to 6.642	Yes	*	0.0213	A-B
HSC-raw vs. MPP	7.938	4.828 to 11.05	Yes	****	<0.0001	A-C
HSC-sub vs. MPP	4.406	1.296 to 7.516	Yes	**	0.0026	B-C
Test details	Mean 1	Mean 2	Mean Diff.	SE of diff.	n1	n2	q	DF
HSC-raw vs. HSC-sub	72.51	68.98	3.532	1.326	500	500	3.768	1497
HSC-raw vs. MPP	72.51	64.58	7.938	1.326	500	500	8.468	1497
HSC-sub vs. MPP	68.98	64.58	4.406	1.326	500	500	4.7	1497

## Sheet: Table S5
Table S5. The statistic information of methylation levels on Distal element
Number of families	1
Number of comparisons per family	3
Alpha	0.05
Tukey's multiple comparisons test	Mean Diff.	95.00% CI of diff.	Below threshold?	Summary	Adjusted P Value
HSC-raw vs. HSC-sub	5.45	3.320 to 7.580	Yes	****	<0.0001	A-B
HSC-raw vs. MPP	12.48	10.35 to 14.61	Yes	****	<0.0001	A-C
HSC-sub vs. MPP	7.034	4.904 to 9.164	Yes	****	<0.0001	B-C
Test details	Mean 1	Mean 2	Mean Diff.	SE of diff.	n1	n2	q	DF
HSC-raw vs. HSC-sub	82.53	77.08	5.45	0.9079	500	500	8.49	1497
HSC-raw vs. MPP	82.53	70.05	12.48	0.9079	500	500	19.45	1497
HSC-sub vs. MPP	77.08	70.05	7.034	0.9079	500	500	10.96	1497

## Sheet: Table S6
Table S6. The statistic information of methylation levels on DNase element
Number of families	1
Number of comparisons per family	3
Alpha	0.05
Tukey's multiple comparisons test	Mean Diff.	95.00% CI of diff.	Below threshold?	Summary	Adjusted P Value
HSC-raw vs. HSC-sub	3.03	0.5540 to 5.506	Yes	*	0.0116	A-B
HSC-raw vs. MPP	5.594	3.118 to 8.070	Yes	****	<0.0001	A-C
HSC-sub vs. MPP	2.564	0.08798 to 5.040	Yes	*	0.0404	B-C
Test details	Mean 1	Mean 2	Mean Diff.	SE of diff.	n1	n2	q	DF
HSC-raw vs. HSC-sub	80.88	77.85	3.03	1.055	500	500	4.06	1497
HSC-raw vs. MPP	80.88	75.29	5.594	1.055	500	500	7.496	1497
HSC-sub vs. MPP	77.85	75.29	2.564	1.055	500	500	3.436	1497

## Sheet: Table S7
Table S7. The statistic information of methylation levels on Proximal element
Number of families	1
Number of comparisons per family	3
Alpha	0.05
Tukey's multiple comparisons test	Mean Diff.	95.00% CI of diff.	Below threshold?	Summary	Adjusted P Value
HSC-raw vs. HSC-sub	2.92	0.05456 to 5.785	Yes	*	0.0446	A-B
HSC-raw vs. MPP	5.678	2.813 to 8.543	Yes	****	<0.0001	A-C
HSC-sub vs. MPP	2.758	-0.1074 to 5.623	No	ns	0.0622	B-C
Test details	Mean 1	Mean 2	Mean Diff.	SE of diff.	n1	n2	q	DF
HSC-raw vs. HSC-sub	68.92	66	2.92	1.221	500	500	3.381	1497
HSC-raw vs. MPP	68.92	63.24	5.678	1.221	500	500	6.574	1497
HSC-sub vs. MPP	66	63.24	2.758	1.221	500	500	3.193	1497

## Sheet: Table S8
Table S8. The statistic information of methylation levels on TFBS
Number of families	1
Number of comparisons per family	3
Alpha	0.05
Tukey's multiple comparisons test	Mean Diff.	95.00% CI of diff.	Below threshold?	Summary	Adjusted P Value
HSC-raw vs. HSC-sub	4.364	1.293 to 7.435	Yes	**	0.0025	A-B
HSC-raw vs. MPP	7.418	4.347 to 10.49	Yes	****	<0.0001	A-C
HSC-sub vs. MPP	3.054	-0.01675 to 6.125	No	ns	0.0516	B-C
Test details	Mean 1	Mean 2	Mean Diff.	SE of diff.	n1	n2	q	DF
HSC-raw vs. HSC-sub	57.25	52.89	4.364	1.309	500	500	4.715	1497
HSC-raw vs. MPP	57.25	49.83	7.418	1.309	500	500	8.015	1497
HSC-sub vs. MPP	52.89	49.83	3.054	1.309	500	500	3.3	1497

## Sheet: Table S9
Table S9. The statistic information of methylation levels on TSS
Number of families	1
Number of comparisons per family	3
Alpha	0.05
Tukey's multiple comparisons test	Mean Diff.	95.00% CI of diff.	Below threshold?	Summary	Adjusted P Value
HSC-raw vs. HSC-sub	-5.228	-8.520 to -1.936	Yes	***	0.0006	A-B
HSC-raw vs. MPP	-12.07	-15.36 to -8.778	Yes	****	<0.0001	A-C
HSC-sub vs. MPP	-6.842	-10.13 to -3.550	Yes	****	<0.0001	B-C
Test details	Mean 1	Mean 2	Mean Diff.	SE of diff.	n1	n2	q	DF
HSC-raw vs. HSC-sub	33.22	38.45	-5.228	1.403	500	500	5.268	1497
HSC-raw vs. MPP	33.22	45.29	-12.07	1.403	500	500	12.16	1497
HSC-sub vs. MPP	38.45	45.29	-6.842	1.403	500	500	6.895	1497

## Sheet: Table S10
Table S10. Enriched GO terms associated with the HSC-raw and HSC-sub
Term	Count	Pvalue	Group
single-organism carbohydrate metabolic process	25	0.0003	Hypermethylaiton
small molecule metabolic process	52	0.0005	Hypermethylaiton
positive regulation of RNA splicing	4	0.0006	Hypermethylaiton
regulation of acute inflammatory response	6	0.0006	Hypermethylaiton
protein O-linked glycosylation via serine	2	0.0007	Hypermethylaiton
protein O-linked glycosylation via threonine	2	0.0013	Hypermethylaiton
positive regulation of appetite	2	0.0013	Hypermethylaiton
response to pain	4	0.0016	Hypermethylaiton
positive regulation of peptidyl-serine phosphorylation	6	0.002	Hypermethylaiton
ribonucleoprotein complex assembly	9	0.0021	Hypermethylaiton
riboflavin metabolic process	2	0.0022	Hypermethylaiton
positive regulation of corticotropin secretion	2	0.0022	Hypermethylaiton
regulation of growth hormone receptor signaling pathway	2	0.0022	Hypermethylaiton
carbohydrate derivative biosynthetic process	24	0.0022	Hypermethylaiton
single-organism biosynthetic process	40	0.0023	Hypermethylaiton
positive regulation of signal transduction	34	0.0037	Hypermethylaiton
choline transport	2	0.0045	Hypermethylaiton
hexose metabolic process	10	0.0045	Hypermethylaiton
actin polymerization or depolymerization	8	0.0045	Hypermethylaiton
regulation of protein processing	5	0.0057	Hypermethylaiton
lung vasculature development	2	0.0059	Hypermethylaiton
negative regulation of protein localization to cell surface	2	0.0059	Hypermethylaiton
positive regulation of protein complex disassembly	3	0.0068	Hypermethylaiton
regulation of actin nucleation	3	0.0068	Hypermethylaiton
cellular biosynthetic process	58	0.0074	Hypermethylaiton
adult feeding behavior	2	0.0076	Hypermethylaiton
O-glycan processing	4	0.0087	Hypermethylaiton
meiotic spindle organization	2	0.0094	Hypermethylaiton
positive regulation of lipoprotein lipase activity	2	0.0094	Hypermethylaiton
mitotic cytokinesis	30	0.0012	Hypomethylation
regulation of dopamine secretion	22	0.0018	Hypomethylation
mitochondrial ornithine transport	1	0.0021	Hypomethylation
7,8-dihydroneopterin 3'-triphosphate biosynthetic process	1	0.0021	Hypomethylation
dopamine transport	16	0.0022	Hypomethylation
catecholamine secretion	10	0.004	Hypomethylation
activation of APC-Cdc20 complex activity	2	0.0042	Hypomethylation
regulation of lung blood pressure	2	0.0042	Hypomethylation
synaptonemal complex disassembly	2	0.0042	Hypomethylation
cellular response to monosodium glutamate	2	0.0042	Hypomethylation
positive regulation of mitotic nuclear division	47	0.0044	Hypomethylation
female meiosis chromosome segregation	3	0.0063	Hypomethylation
atrial cardiac muscle cell development	3	0.0063	Hypomethylation
L-ornithine transmembrane transport	3	0.0063	Hypomethylation
positive regulation of histone H2B ubiquitination	4	0.0084	Hypomethylation
monoamine transport	10	0.0088	Hypomethylation
osteoblast differentiation	2	0.009	Hypomethylation
regulation of amine transport	4	0.0093	Hypomethylation
Note: The methylation difference is defined by the average methylation level between the two groups of cells. "Hypermethylaiton" indicates that HSC-raw subpopulation has a higher methylation level than HSC-sub and vice versa.

[truncated: 1 more sheets: Table S11]
